# Supplementary material for: Modeling fuel-, vehicle-type-, and age-specific CO 2 emissions from global on-road vehicles in 1970–2020
Source: Copernicus journal article supplement (doi:10.5194/essd-16-4497-2024), 2024-10-08
Supplement: Supplementary file 2 [file essd-16-4497-2024-supplement.zip]

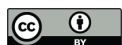

## *Supplement of*

# **Modeling fuel-, vehicle-type-, and age-specific CO<sub>2</sub> emissions from global on-road vehicles in 1970–2020**

**Liu Yan et al.**

*Correspondence to:* Qiang Zhang ([qiangzhang@tsinghua.edu.cn](mailto:qiangzhang@tsinghua.edu.cn))

- [essd-16-4497-2024-supplement-title-page.pdf](#)
- [Figures.xlsx](#)
- [essd\\_SI\\_GlobalVehicleCO2.pdf](#)

The copyright of individual parts of the supplement might differ from the article licence.
